# Supplementary material for: A UK-based Mixed-Methods Study Investigating the Mental Health and Therapeutic Needs of Autistic Adolescents after COVID19
Source: Research Square preprint supplement (doi:10.21203/rs.3.rs-7288544/v1), 2025-09-18
Supplement: Supplementary file 1 [file 9f85924f426c70d11f9f2c10.docx]

Phase Two Survey Questions

| **Demographic Questions** | **Possible Answers** |
| --- | --- |
| **Is someone helping you answer these questions?** | Yes (please state how)  No |
| **Do you have an official autism diagnosis?** | Yes  No (ends participation) |
| **Gender:** | Male  Female  Non-binary  Transgender  Other |
| **Age:** | 13  14  15  16  17 |
| **Ethnicity:** | White-British  White-Other  Mixed  Indian  Chinese  Pakistani  Bangladeshi  Black-British  Black-Other  African  Caribbean  Gypsy Traveller  Arab  Other |
| **Do you have a mental health condition diagnosed by a doctor?** | Yes  No |
| If yes, what is your condition? (tick all appropriate) | Anxiety  Depression  OCD  Psychosis  Other (please state)  Prefer not to say |

| **Questions** | **Possible Answers** |
| --- | --- |
| **Before COVID19 how was your mental health?** | Likert Scale (with emoji/faces)  1 (really bad) - 5 (really good) |
| **How is your mental health now?** | Likert Scale (with emoji/faces)  1 (really bad) - 5 (really good) |
| **If it has got worse, do you think COVID19 had an impact?** | Yes  No |
| If yes, what caused this? (tick as many as required) | Not going to school  Not seeing friends  Not seeing family  Not being able to go to places where I was getting support e.g., counselling, groups, doctors  Being unwell  Caring for someone who was unwell  Other (please state) |
| **Are you getting support for your mental health?** | Yes  No |
| If yes, who from? (tick as required) | School  CAMHS  Doctors  Counsellor/Therapist  Other (please state) |
| If no, why not? (tick as required) | On a waiting list  I have not told anyone yet  My support has ended  Other (please state) |
| **Do you think there is enough understanding about autism from others?** | Yes  No |
| **Do you think there is enough understanding about mental health from others?** | Yes  No |
| **Have you ever felt that your mental health was ignored because you have autism?** | Yes  No |
| **If you have had counselling or therapy before was it helpful?** | Yes  No  I have not had counselling or therapy before |
| If yes, what kind of counselling or therapy did you have? | CBT Skills Training  Art Therapy  Play therapy  Talking therapy  Other (please state) |
| If no, why not? | I did not like my counsellor  My counsellor did not understand me  My counsellor told me what to do/gave too much advice  My counsellor thought autism was a problem  Other (please state) |
| **Are you happy to be contacted for a short online focus group to answer more questions about your opinions? Your parents will also be contacted to ask their permission** | Yes  No |

**Thank you for participating (*contact details of researcher provided again), if any of these questions have made you feel upset or distressed, please contact the researcher.***
