# Supplementary material for: A UK-based Mixed-Methods Study Investigating the Mental Health and Therapeutic Needs of Autistic Adolescents after COVID19
Source: Research Square preprint supplement (doi:10.21203/rs.3.rs-7288544/v1), 2025-09-18
Supplement: Supplementary file 2 [file a8507335181c2006c4170cbd.docx]

Phase Two Focus Group Questions

Provide information sheet and gain informed consent before continuing

*For the following questions please consider these definitions when answering:*

*Nondirective therapy: The therapist or counsellor is encouraging and does not direct the session or tells you what to do. You lead the session by sharing your feelings, problems and understanding your behaviour supported by the therapist.*

*Directive therapy: The therapist or counsellor leads the session based on what they think is important to you. The counsellor/therapist has training and experience which helps them tell you how to change your behaviour.*

**Questions:**

1. What do you think could be done to improve mental health support for autistic adolescents?
2. Listening to the two definitions of types of therapy, which one would you find most useful and why?
3. Looking at these guidelines for therapy, what are your thoughts on this? (show them the eight guidelines/share screen) and talk through each in turn:
   1. Develop a warm and friendly relationship with you.
   2. Accepts the you as you are
   3. Encourages you to express all your feelings
   4. Listens to your feelings and helps you understand yourself and your behaviour
   5. Believes in you to make your own choices, make changes and solve your problems.
   6. Does not lead the session or tell you what to do but follows what you want to do
   7. Does not hurry the therapy or tell you when to end your sessions
   8. Explains what their job is and what you can expect from them and what they expect from you
4. What could counsellors or therapists do to better support you and your mental health?
5. What has been the hardest part of COVID19?
6. Would it be helpful if there was some support given to your parents to help them better support you at home?
   1. If yes, what would be helpful for parents to know or learn?

**Thank you for participating (*contact details of researcher provided again)***
